# Supplementary material for: Modeling risk dynamics of contaminants of emerging concern in a temperate-region wastewater effluent-dominated stream
Source: Royal Society of Chemistry journal article supplement (doi:10.1039/d2ew00157h), 2022-01-01
Supplement: d2ew00157h1.pdf [file d2ew00157h1.pdf]

Supplementary Information

# Modeling Risk Dynamics of Contaminants of Emerging Concern in a Temperate-region Wastewater Effluent-dominated Stream

Hui Zhi,<sup>§,¶</sup> Danielle Webb,<sup>§,¶</sup> Jerald L. Schnoor,<sup>§,¶</sup> Dana W. Kolpin,<sup>Δ</sup> Rebecca D. Klaper,<sup>¥</sup> Luke

R. Iwanowicz,<sup>#</sup> Shannon M. Meppelink,<sup>Δ</sup> Gregory H. LeFevre<sup>§,¶,\*</sup>

<sup>§</sup>Department of Civil & Environmental Engineering, University of Iowa, 4105 Seamans Center, Iowa City, IA 52242, United States;

<sup>¶</sup>IIHR-Hydroscience & Engineering, 100 C. Maxwell Stanley Hydraulics Laboratory, Iowa City, IA 52242, United States;

<sup>Δ</sup>U.S. Geological Survey, Central Midwest Water Science Center, 400 S. Clinton St, Rm 269 Federal Building, Iowa City, IA 52240, United States;

<sup>#</sup>U.S. Geological Survey, Eastern Ecological Science Center, 11649 Leetown Road, Kearneysville, WV 25430, United States;

<sup>¥</sup>University of Wisconsin-Milwaukee, School of Freshwater Sciences, 600 E. Greenfield Ave, Milwaukee, WI 53204, United States.

**\*Corresponding Author:**

gregory-lefevre@uiowa.edu; Phone: 319-335-5655; 4105 Seamans Center for Engineering, University of Iowa, Iowa City IA, United States

Any use of trade, firm, or product, names is for descriptive purposes only and does not imply endorsement by the authors or the U.S. Government.

**CONTAINS:**

**Field site details, chemical details, 18 Supporting Tables, 11 Supporting Figures, Supporting References, 23 pages in total.**

## SUPPORTING METHODS

**Table S.1:** Land use information from Muddy Creek.<sup>1</sup>

| Station Name        | Open Water | Developed | Barren Land (Rock/Sand/Clay) | Forest | Shrub/Scrub | Grassland/Herbaceous | Pasture/Hay | Cultivated Crops | Wetlands |
|---------------------|------------|-----------|------------------------------|--------|-------------|----------------------|-------------|------------------|----------|
| US1 (05454050)      | 0.13%      | 72.5%     | 0.07%                        | 1.69%  | 0%          | 1.61%                | 2.82%       | 20.72%           | 0.44%    |
| Effluent (05454051) | 0.13%      | 72.5%     | 0.07%                        | 1.70%  | 0%          | 1.61%                | 2.81%       | 20.69%           | 0.46%    |
| DS1 (05454052)      | 0.13%      | 72.3%     | 0.07%                        | 2.0%   | 0%          | 1.60%                | 2.86%       | 20.52%           | 0.47%    |
| DS2 (05454090)      | 0.40%      | 60.0%     | 0.04%                        | 12.4%  | 0.02%       | 2.38%                | 7.06%       | 17.45%           | 0.31%    |

Data from USGS National Landcover Database (2019).

**Table S.2:** Sampling timelines of monitoring contaminants of emerging concern (CECs). One data set consisted of four samples from each of the four sampling sites (US1, Effluent, DS1 and DS2)

| Chemical                                                   | Frequency           | Data sets                          | Year 1 (September 2017-August 2018) | Year 2 (September 2018-August 2019) |
|------------------------------------------------------------|---------------------|------------------------------------|-------------------------------------|-------------------------------------|
| Pharmaceuticals and atrazine <sup>2</sup>                  | monthly             | 12                                 |                                     |                                     |
| Pharmaceuticals and industrial chemicals <sup>1</sup>      | monthly             | 12                                 |                                     |                                     |
| Pharmaceuticals and industrial chemicals                   | Three times per day | 12                                 |                                     | July 14-July 18, 2019               |
| Neonicotinoids <sup>3</sup>                                | biweekly            | 17                                 |                                     |                                     |
| Pharmaceuticals and industrial chemicals in drinking water | one time            | 2 (1 for influent, 1 for effluent) |                                     | May 12, 2018                        |

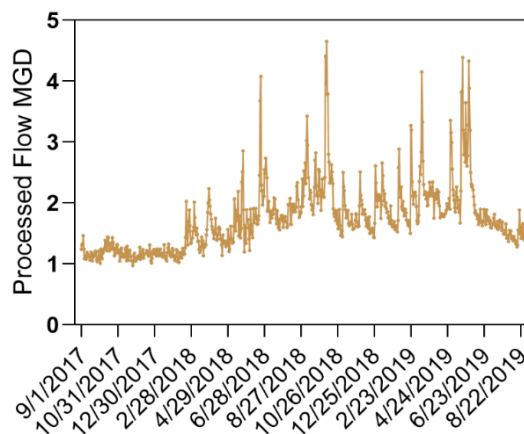

**Figure S.1:** Wastewater treatment plant (WWTP) daily processed flow discharges during September 2017- August 2019. Data were provided by the North Liberty WWTP.<sup>1</sup>

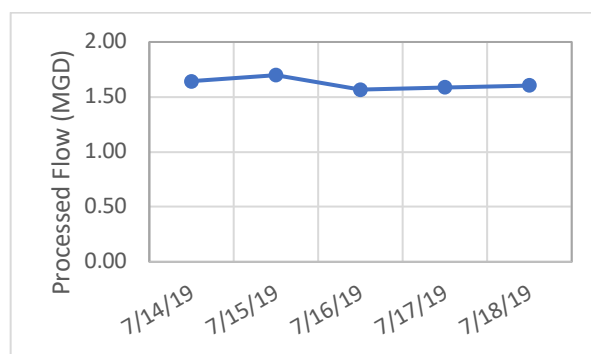

**Figure S.2:** Daily processed flow in North Liberty Wastewater treatment during July 14–July 18, 2019.

**Table S.3:** Chemical properties of CECs investigated in the present study.

|                        | Category                      | CAS         | logKow <sup>§</sup> | pKa <sup>§</sup> | LogKoc <sup>4</sup>    | Predicted biodegradation half-lives (d) <sup>5</sup> | Photolysis half-lives (d) |
|------------------------|-------------------------------|-------------|---------------------|------------------|------------------------|------------------------------------------------------|---------------------------|
| Venlafaxine            | Antidepressant pharmaceutical | 93413-69-5  | 3.28                | 14.4; 8.9        | 3.2                    | 3.36                                                 | 2.4–15 <sup>6,7</sup>     |
| Desvenlafaxine         | Antidepressant pharmaceutical | 93413-62-8  | 0.74                | 8.9; 10.1        | 3.5                    | 4.66                                                 | 0.75 <sup>7</sup>         |
| Metformin              | Antidiabetic pharmaceutical   | 657-24-9    | -2.64               | 12.3             | 2.1                    | 3.98                                                 | negligible <sup>8</sup>   |
| Guanylurea             | Metformin metabolite          | 141-83-3    | -2.51               | 8.0; 13.5        | 2.0                    | 4.10                                                 | negligible <sup>9</sup>   |
| Fluconazole            | Anti-fungal pharmaceutical    | 86386-73-4  | 0.25                | 12.7             | NA                     | 4.46                                                 | 0.08 <sup>10</sup>        |
| Bupropion              | Antidepressant pharmaceutical | 34911-55-2  | 3.85                | 7.2              | 3.0                    | 3.39                                                 | negligible <sup>11</sup>  |
| Citalopram             | Antidepressant pharmaceutical | 59729-33-8  | 3.74                | 9.5              | 4.4; 5.6 <sup>12</sup> | 3.55                                                 | negligible <sup>6</sup>   |
| Atenolol               | Beta-blocker pharmaceutical   | 29122-68-7  | 0.16                | 9.6              | 2.17                   | 3.34                                                 | 3.2–30.4 <sup>13</sup>    |
| Carbamazepine          | Anti-seizure pharmaceutical   | 298-46-4    | 2.45                | 15.9             | 3.6                    | 5.03                                                 | 3.5–416 <sup>13–15</sup>  |
| Tramadol               | Pain-relief pharmaceutical    | 27203-92-5  | 3.01                | 9.2; 13.8        | 2.79                   | 3.35                                                 | 3.04 <sup>7</sup>         |
| Sulfamethoxazole       | Antibiotic pharmaceutical     | 723-46-6    | 0.89                | 1.9; 6.2; 0.3    | 1.86                   | 3.34                                                 | 2.4–6.1 <sup>14,15</sup>  |
| Fexofenadine           | Antihistamine pharmaceutical  | 83799-24-0  | 0.3                 | 8.8; 4.3         | 1.54                   | 26.2                                                 | 4.4–6.8 <sup>14</sup>     |
| Methocarbamol          | Muscle relaxer pharmaceutical | 532-03-6    | 0.61                | 13.6             | 1.7                    | 4.48                                                 | NA                        |
| Lidocaine              | Anesthetic pharmaceutical     | 137-58-6    | 2.26                | 7.7; 13.8        | 2.6                    | 3.36                                                 | 1.3 <sup>7</sup>          |
| 1H-benzotriazole       | industrial chemical           | 95-14-7     | 1.44                | 8.4              | 1–2.7                  | 3.99                                                 | 9.0 ± 0.3 <sup>16</sup>   |
| 5-methyl-benzotriazole | industrial chemical           | 136-85-6    |                     | 8.8              | 2.04                   | 2.53                                                 | 2.5 ± 0.1 <sup>16</sup>   |
| Atrazine               | Herbicide                     | 1912-24-9   | 2.68                | 1.68             | 1.96–3.38              | 4.91                                                 |                           |
| Clothianidin           | Neonicotinoid pesticide       | 210880-92-5 | 0.7                 | 11.09            | 1.78                   | 3.55                                                 |                           |
| Imidacloprid           | Neonicotinoid pesticide       | 138261-41-3 | 0.57                | 11.12            | 2.56                   | 3.54                                                 |                           |
| Thiamethoxam           | Neonicotinoid pesticide       | 153719-23-4 | -0.13               | 0.41             | 1.84                   | 4.45                                                 |                           |

(§ citation for pKa, logKow: Kim et al.<sup>17</sup>; NA: not available)

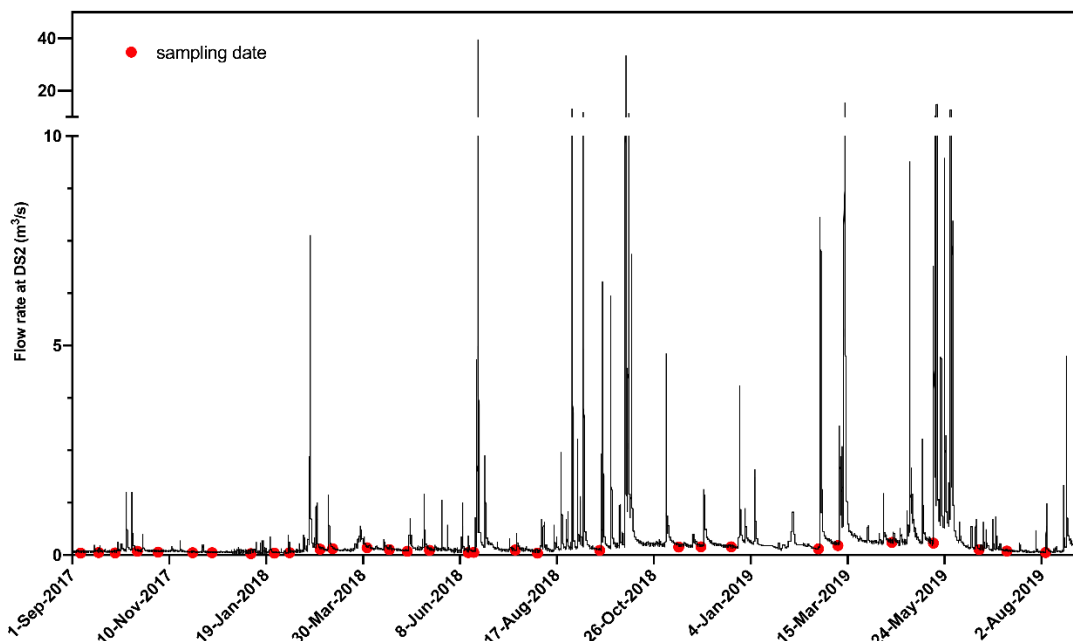

**Figure S.3:** Two-year diurnal hydrograph at DS2 (Station ID 05454090).<sup>1,2</sup> Red dots represent dates when sampling events occurred (n=37). All samples were collected during baseflow conditions.

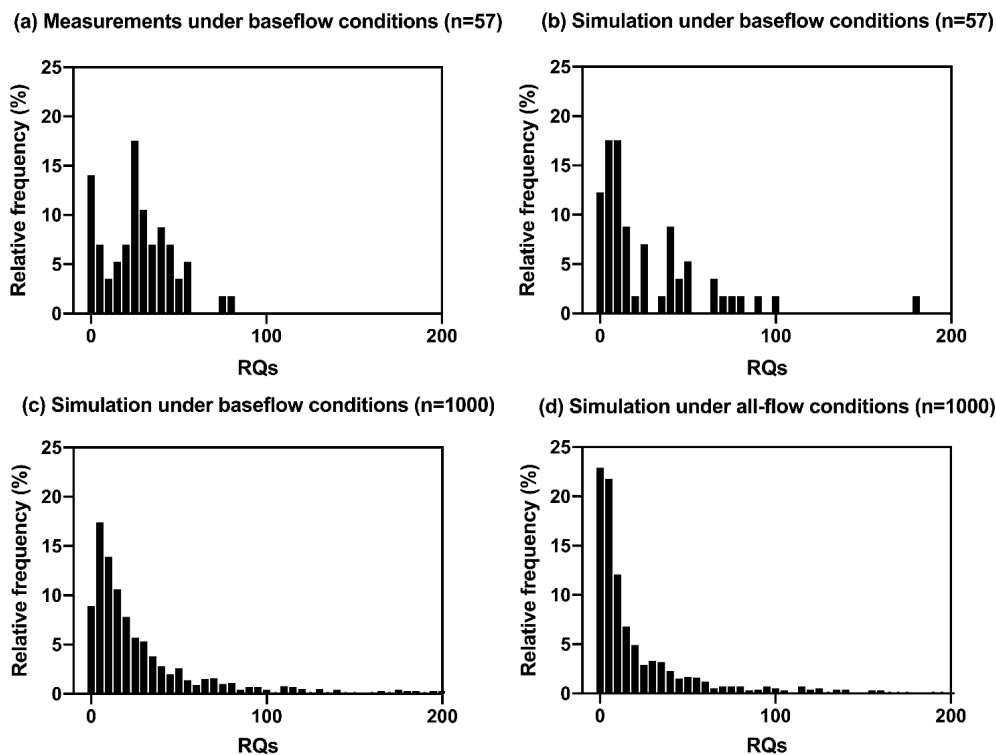

**Figure S.4:** Example of Monte Carlo simulation of risk quotients (RQs). (a) RQs relative frequency from our field measured data fexofenadine under baseflow conditions (n=57); (b) Simulated RQs relative frequency under baseflow conditions (n=57); (c) Simulated RQs relative frequency under baseflow conditions (n=1000); (d) Simulated RQs relative frequency percentage under all-flow conditions (n=1000).

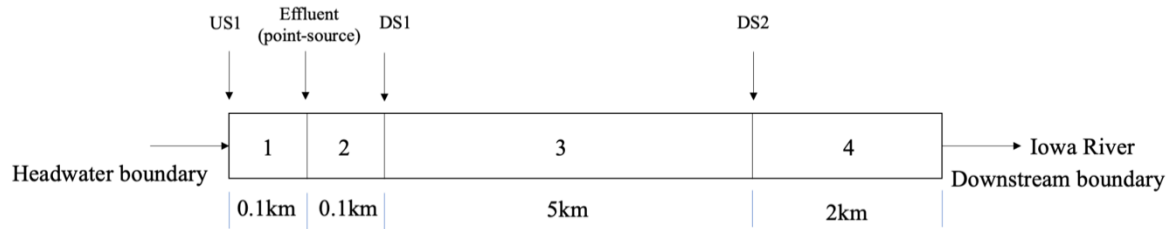

**Figure S.5:** System segmentation of Muddy Creek field site in QUAL2K modeling.

A steady-state flow balance is implemented for each model element. Once the flow of an element has been solved, the velocity and depth are calculated using the empirically derived rating curves as proposed by Leopold and Maddock<sup>18</sup>:

$$U = aQ^b \quad \text{S.1}$$

$$H = \alpha Q^\beta \quad \text{S.2}$$

where  $U$  is flow velocity (m/s),  $Q$  is flow rate (m<sup>3</sup>/s),  $H$  is water depth (m) and  $a$ ,  $b$ ,  $\alpha$  and  $\beta$  are empirical coefficients that can be determined from the hydraulic measurements and stream geometry.

## SUPPORTING RESULTS

**Table S.4:** Median lethal dose (LC50) values or half-maximal effective concentration values (EC50; in mg/L) that were used to calculate predicted no-effect concentration (PNEC; in µg/L) (by dividing LC50 or EC50 by an assessment factor of 1000) for fish, invertebrate (mostly *Daphnia magna*), and algae for acute effects. Toxicity data were selected based on Table S.5.

| Compound               | EC50/LC50 (mg/L) |              |       | PNEC (µg/L) |              |       |
|------------------------|------------------|--------------|-------|-------------|--------------|-------|
|                        | Algae            | Invertebrate | Fish  | Algae       | Invertebrate | Fish  |
| Atenolol               | 2337             | 6799         | 14438 | 2337        | 6799         | 14438 |
| Atrazine               | 0.042            | 0.24         | 6.21  | 0.042       | 0.24         | 6.21  |
| Bupropion              | 0.36             | 0.48         | 3.23  | 0.36        | 0.48         | 3.23  |
| Carbamazepine          | 27               | 27           | 22    | 27          | 27           | 22    |
| Citalopram             | 0.36             | 0.65         | 4.5   | 0.36        | 0.65         | 4.5   |
| Clothianidin           | 56               | 0.0024       | 101.5 | 56          | 0.0024       | 101.5 |
| Desvenlafaxine         | 32.3             | 33           | 9.4   | 32.3        | 33           | 9.4   |
| Fexofenadine           | 200              | 780          | 940   | 200         | 780          | 940   |
| Fluconazole            | –                | –            | –     | –           | –            | –     |
| Guanylurea             | –                | –            | –     | –           | –            | –     |
| Imidacloprid           | 10               | 0.0015       | 9.02  | 0.0055      | 0.0015       | 277   |
| Lidocaine              | 0.64             | 6.2          | 56.2  | 0.64        | 6.2          | 56.2  |
| Metformin              | 110              | 32           | 982   | 110         | 64           | 14034 |
| Methocarbamol          | 962              | 1770         | 643   | 962         | 1770         | 643   |
| Sulfamethoxazole       | 0.027            | 4.5          | 56.2  | 0.027       | 4.5          | 56.2  |
| Thiamethoxam           | 81.8             | 0.024        | 80    | 81.8        | 0.024        | 80    |
| Tramadol               | 0.82             | 1.41         | 11.4  | 0.82        | 1.41         | 11.4  |
| Venlafaxine            | 13               | 10           | 16    | 13          | 10           | 16    |
| 1H-benzotriazole       | 5.9              | 66.8         | 28    | 5.9         | 66.8         | 28    |
| 5-methyl-benzotriazole | 23.2             | 50.89        | 22    | 23.2        | 50.89        | 22    |

Note: “–” indicates data unavailable.

**Table S.5:** Median lethal dose (LC50) or half-maximal effective concentration (EC50) (in mg/L) based on acute effects are used to calculate predicted no-effect concentration (PNEC) (by dividing LC50 or EC50 by an assessment factor of 1000) for fish, invertebrate, and algae.

| Compound               | EC50/LC50 (mg/L)               |                                     |                                     |
|------------------------|--------------------------------|-------------------------------------|-------------------------------------|
|                        | Algae                          | Invertebrate                        | Fish                                |
| Atenolol               | 2337 <sup>19</sup>             | 6799 <sup>19</sup>                  | 14438 <sup>19</sup>                 |
| Atrazine               | 0.042–0.104 <sup>20,21</sup>   | 0.24–29 <sup>21–23</sup>            | 6.21–12.9 <sup>24</sup>             |
| Bupropion              | 0.36 <sup>25</sup>             | 0.48 <sup>25</sup>                  | 3.23–503 <sup>25,26</sup>           |
| Carbamazepine          | 27 <sup>27</sup>               | 27 <sup>27</sup>                    | 22 <sup>27</sup>                    |
| Citalopram             | 0.36 <sup>19</sup>             | 0.65 <sup>19</sup>                  | 4.5 <sup>19</sup>                   |
| Clothianidin           | 56 <sup>28</sup>               | 2.41 µg/L–119 <sup>28,29</sup>      | 101.5 <sup>28</sup>                 |
| Desvenlafaxine         | 32.3 <sup>21</sup>             | 33 <sup>21</sup>                    | 9.4 <sup>21</sup>                   |
| Fexofenadine           | 200 <sup>30</sup>              | 780 <sup>30</sup>                   | 940 <sup>30</sup>                   |
| Fluconazole            | –                              | –                                   | –                                   |
| Guanylurea             | –                              | –                                   | –                                   |
| Imidacloprid           | 10 <sup>21</sup>               | 1.52 µg/L–85 <sup>21,29,31–33</sup> | 9.02–277 <sup>21,32,34</sup>        |
| Lidocaine              | 0.64–140 <sup>19,25</sup>      | 6.2–215 <sup>19,25</sup>            | 56.2–390 <sup>19,25</sup>           |
| Metformin              | 110–320 <sup>21,35</sup>       | 32–64 <sup>21,36</sup>              | 982–14034 <sup>21,25</sup>          |
| Methocarbamol          | 962 <sup>25</sup>              | 1770 <sup>25</sup>                  | 643 <sup>25</sup>                   |
| Sulfamethoxazole       | 0.027 <sup>37</sup>            | 4.5 <sup>38</sup>                   | 56.2 <sup>39</sup>                  |
| Thiamethoxam           | 81.8 <sup>21,40</sup>          | 0.014–100 <sup>21,29,40</sup>       | 80–100 <sup>32,40</sup>             |
| Tramadol               | 0.82–8.7 <sup>25,27</sup>      | 1.41–28 <sup>25,27</sup>            | 11.4–70 <sup>25,27</sup>            |
| Venlafaxine            | 13–66 <sup>19,25</sup>         | 10–140 <sup>19,21,25</sup>          | 16–249 <sup>19,25</sup>             |
| 1H-benzotriazole       | 5.9–156.16 <sup>21,41–43</sup> | 66.8–288.14 <sup>21,41–45</sup>     | 28–548.05 <sup>21,41,42,46,47</sup> |
| 5-methyl-benzotriazole | 23.2–72.96 <sup>42,43,48</sup> | 50.89–109.24 <sup>42,43,45,48</sup> | 22–197.53 <sup>42,46–50</sup>       |

**Table S.6:** Chronic toxicity data used for risk assessment selected based on Table S.7. An assessment factor of 10 was applied to calculate PNEC values.

| Compound               | NOEC/LOEC/EC10 (mg/L) |                      |                     | PNEC( $\mu\text{g/L}$ ) |              |      |
|------------------------|-----------------------|----------------------|---------------------|-------------------------|--------------|------|
|                        | Algae                 | Invertebrate         | Fish                | Algae                   | Invertebrate | Fish |
| 1H-benzotriazole       | 1.18                  | 0.97                 | 46                  | 118                     | 97           | 4600 |
| 5-methyl-benzotriazole | 2.11                  | 0.4                  | 11                  | 211                     | 40           | 1100 |
| Clothianidin           | –                     | 0.28 $\mu\text{g/L}$ | 9.7                 | –                       | 0.028        | 970  |
| Imidacloprid           | 30 ng/L               | 1.8–42               | 50                  | 0.003                   | 180          | 5000 |
| Thiamethoxam           | 81.8                  | 0.3 $\mu\text{g/L}$  | 20                  | 8180                    | 0.03         | 2000 |
| Atrazine               | 0.011                 | 29                   | 100 $\mu\text{g/L}$ | 1.1                     | 2900         | 10   |

Note: “–” indicates data not available.

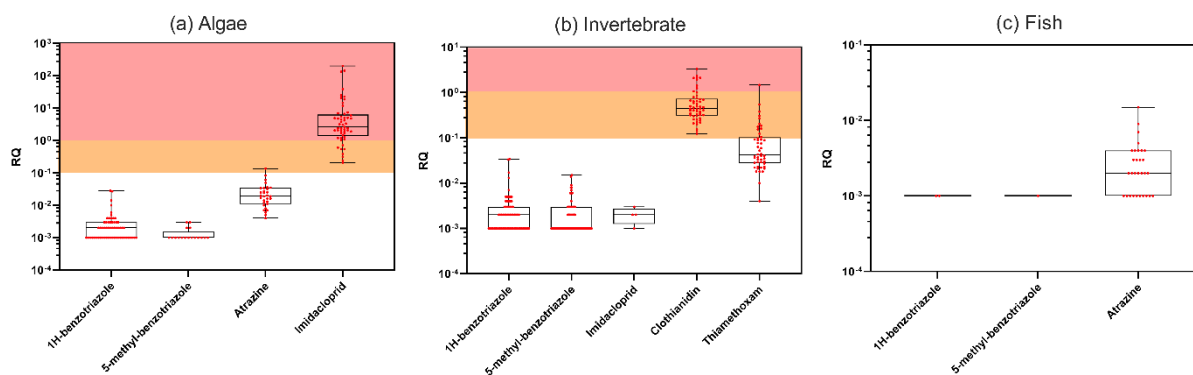

**Figure S.6:** Measured risk quotients (RQs) for algae (a), invertebrates (b) and fish (c) of industrial chemicals and pesticides aggregated from all three in-stream sites (US1, DS1, DS2) based on **chronic toxicity data** in Muddy Creek. RQs  $< 10^{-4}$  were considered negligible risks and were not included in the figure. Chemicals not present in the figure were due to all RQs were  $< 10^{-4}$ . The chronic toxicity data of clothianidin to algae were not available based on our literature search. Red shade indicates high risk ( $\text{RQ} \geq 1$ ), orange shade indicates medium risk ( $0.1 \leq \text{RQ} < 1$ ), no shade indicates low risks. The box and whiskers from bottom to top represent minimum value, 25th percentile, median value, 75th percentile and maximum value.

**Table S.7:** Toxicity data for industrial chemicals and pesticides.

| Compound               | Class        | Species                                         | Duration | Effect       | Guideline | Endpoint  | Value (mg/L) | Reference     |
|------------------------|--------------|-------------------------------------------------|----------|--------------|-----------|-----------|--------------|---------------|
| 1H-benzotriazole       | Algae        | <i>Desmodesmus subspicatus</i>                  | 72h      | -            | OECD 201  | NOEC/EC10 | 1.18         | <sup>21</sup> |
| 1H-benzotriazole       | Algae        | <i>Lemna minor</i>                              | 7d       | -            | OECD 201  | EC10      | 3.94         | <sup>21</sup> |
| 1H-benzotriazole       | Invertebrate | <i>Daphnia galeata</i>                          | 21d      | -            | OECD 201  | EC10      | 0.97         | <sup>21</sup> |
| 1H-benzotriazole       | Fish         | <i>Danio rerio</i>                              | 96h      | Mortality    | USEPA     | NOAEC     | 46           | <sup>47</sup> |
| 1H-benzotriazole       | Fish         | <i>Danio rerio</i>                              | 96h      | Mortality    | USEPA     | LOAEC     | 92           | <sup>47</sup> |
| 5-methyl-benzotriazole | Algae        | <i>Desmodesmus subspicatus</i>                  | 72h      | -            | OECD 201  | EC10      | 2.86         | <sup>21</sup> |
| 5-methyl-benzotriazole | Algae        | <i>Lemna minor</i>                              | 7d       | -            | OECD 201  | EC10      | 2.11         | <sup>21</sup> |
| 5-methyl-benzotriazole | Invertebrate | <i>Daphnia magna</i>                            | 21d      | Reproduction | OECD 201  | NOAEC     | 6.4          | <sup>43</sup> |
| 5-methyl-benzotriazole | Invertebrate | <i>Daphnia galeata</i>                          | 21d      | Reproduction | OECD 201  | NOAEC     | 1            | <sup>43</sup> |
| 5-methyl-benzotriazole | Invertebrate | <i>Daphnia galeata</i>                          | 21d      | Reproduction | OECD 201  | LOAEC     | 2            | <sup>43</sup> |
| 5-methyl-benzotriazole | Invertebrate | <i>Daphnia galeata</i>                          | 21d      | -            | OECD 201  | EC10      | 0.4          | <sup>21</sup> |
| 5-methyl-benzotriazole | Invertebrate | <i>Ceriodaphnia dubia</i>                       | 48h      | Mortality    | USEPA     | NOAEC     | 47           | <sup>47</sup> |
| 5-methyl-benzotriazole | Invertebrate | <i>Ceriodaphnia dubia</i>                       | 48h      | Mortality    | USEPA     | LOAEC     | 94           | <sup>47</sup> |
| 5-methyl-benzotriazole | Invertebrate | <i>Ceriodaphnia dubia</i>                       | 48h      | Mortality    | USEPA     | NOAEC     | 47           | <sup>47</sup> |
| 5-methyl-benzotriazole | Fish         | <i>Pimephales promelas</i><br>(Fathead minnows) | 96h      | Mortality    | USEPA     | NOAEC     | 11           | <sup>47</sup> |
| 5-methyl-benzotriazole | Fish         | <i>Pimephales promelas</i><br>(Fathead minnows) | 96h      | Mortality    | USEPA     | LOAEC     | 24           | <sup>47</sup> |
| Imidacloprid           | Algae        | <i>Tetraedon sp.</i>                            | 72h      | Biomass      | OECD 201  | NOEC      | 30 ng/L      | <sup>51</sup> |
| Imidacloprid           | Algae        | -                                               | 72h      | Growth rate  | OECD 201  | NOEC      | 10           | <sup>21</sup> |
| Imidacloprid           | Invertebrate | -                                               | 21d      | -            | OECD 201  | NOEC      | 1.8          | <sup>21</sup> |
| Imidacloprid           | Invertebrate | -                                               | 48h      | -            | OECD 201  | NOEC      | 42           | <sup>21</sup> |
| Imidacloprid           | Invertebrate | <i>Chironomus dilutus</i>                       | 96h      | -            | USEPA     | EC10      | 0.13 µg/L    | <sup>52</sup> |
| Imidacloprid           | Invertebrate | <i>Neocloeon triangulifer</i>                   | 96h      | -            | USEPA     | EC10      | 1.12 µg/L    | <sup>52</sup> |
| Imidacloprid           | Fish         | <i>Oncorhynchus mykiss</i><br>(Rainbow Trout)   | 96h      |              | OECD 201  | NOEC      | 50           | <sup>21</sup> |



|              |              |                                                 |     |                   |           |      |            |               |
|--------------|--------------|-------------------------------------------------|-----|-------------------|-----------|------|------------|---------------|
| Clothianidin | Algae        | -                                               | -   | -                 | -         | -    | -          | -             |
| Clothianidin | Invertebrate | <i>Chironomus dilutus</i>                       |     | -                 | USEPA     | EC10 | 0.42 µg/L  | <sup>52</sup> |
| Clothianidin | Invertebrate | <i>Neocloeon triangulifer</i>                   |     | -                 | USEPA     | EC10 | 0.28 µg/L  | <sup>52</sup> |
| Clothianidin | Fish         | <i>Pimephales promelas</i><br>(Fathead minnows) |     | -                 | USEPA     | NOEC | 9.7        | <sup>53</sup> |
| Thiamethoxam | Invertebrate | <i>Cloeon dipterum</i>                          |     | -                 | OECD 2006 | NOEC | 0.3 µg/L   | <sup>21</sup> |
| Thiamethoxam | Invertebrate | <i>Chironomus dilutus</i>                       |     | -                 | USEPA     | EC10 | 11.15 µg/L | <sup>52</sup> |
| Thiamethoxam | Fish         | <i>Oncorhynchus mykiss</i><br>(Rainbow Trout)   | 88d | -                 | OECD 201  | NOEC | 20         | <sup>21</sup> |
| Atrazine     | Algae        | <i>Desmodesmus subspicatus</i>                  | 72h | -                 | OECD 201  | NOEC | 0.011      | <sup>21</sup> |
| Atrazine     | Invertebrate | <i>Daphnia magna</i>                            | 40h | Visual inspection | OECD 201  | NOEC | 29         | <sup>21</sup> |
| Atrazine     | Fish         | -                                               |     | -                 | USEPA     | LOEC | 100 µg/L   | <sup>54</sup> |

**Table S.8 (a-c):** RQs of acute effect from measured field data under baseflow conditions for algae, invertebrate and fish. “-” indicated RQs <10<sup>-4</sup>.

**(a) Algae**

| RQs                    | Max    | Median | Min   | Mean   | Std.   |
|------------------------|--------|--------|-------|--------|--------|
| 1H-benzotriazole       | 0.556  | 0.027  | 0.002 | 0.052  | 0.094  |
| 5-methyl-benzotriazole | 0.026  | 0.002  | 0.001 | 0.004  | 0.005  |
| Atrazine               | 3.571  | 0.495  | 0.115 | 0.695  | 0.687  |
| Bupropion              | 1.466  | 0.466  | 0.101 | 0.534  | 0.307  |
| Carbamazepine          | 0.017  | 0.008  | 0.002 | 0.008  | 0.004  |
| Citalopram             | 1.541  | 0.101  | 0.005 | 0.355  | 0.392  |
| Clothianidin           | 0.002  | 0.001  | 0.001 | 0.001  | 0.000  |
| Desvenlafaxine         | 0.055  | 0.011  | 0.001 | 0.020  | 0.016  |
| Fexofenadine           | 0.020  | 0.007  | 0.001 | 0.008  | 0.004  |
| Imidacloprid           | 0.060  | 0.001  | 0.001 | 0.006  | 0.013  |
| Lidocaine              | 0.742  | 0.163  | 0.008 | 0.240  | 0.204  |
| Metformin              | 0.108  | 0.006  | 0.001 | 0.009  | 0.014  |
| Methocarbamol          | 0.398  | 0.058  | 0.006 | 0.083  | 0.075  |
| Sulfamethoxazole       | 51.111 | 7.678  | 0.018 | 12.319 | 12.656 |
| Thiamethoxam           | 0.001  | 0.001  | 0.001 | 0.001  | 0.000  |
| Tramadol               | 0.624  | 0.133  | 0.003 | 0.215  | 0.190  |
| Venlafaxine            | 0.087  | 0.040  | 0.008 | 0.042  | 0.021  |

**(b) Invertebrate**

| RQ                     | Max     | Median | Min   | Mean   | Std.   |
|------------------------|---------|--------|-------|--------|--------|
| 1H-benzotriazole       | 0.049   | 0.003  | 0.001 | 0.005  | 0.009  |
| 5-methyl-benzotriazole | 0.012   | 0.001  | 0.001 | 0.002  | 0.002  |
| Atrazine               | 0.625   | 0.087  | 0.020 | 0.122  | 0.120  |
| Bupropion              | 1.100   | 0.349  | 0.075 | 0.400  | 0.230  |
| Carbamazepine          | 0.017   | 0.008  | 0.002 | 0.008  | 0.004  |
| Citalopram             | 0.853   | 0.056  | 0.003 | 0.196  | 0.217  |
| Clothianidin           | 38.667  | 5.125  | 1.442 | 8.118  | 7.718  |
| Desvenlafaxine         | 0.054   | 0.011  | 0.001 | 0.019  | 0.016  |
| Fexofenadine           | 0.005   | 0.002  | 0.001 | 0.002  | 0.001  |
| Imidacloprid           | 400.667 | 5.207  | 0.413 | 28.040 | 73.520 |
| Lidocaine              | 0.077   | 0.017  | 0.001 | 0.025  | 0.021  |
| Metformin              | 0.372   | 0.020  | 0.001 | 0.029  | 0.049  |
| Methocarbamol          | 0.216   | 0.030  | 0.001 | 0.044  | 0.041  |
| Sulfamethoxazole       | 0.307   | 0.046  | 0.001 | 0.074  | 0.076  |
| Thiamethoxam           | 1.825   | 0.052  | 0.005 | 0.145  | 0.277  |
| Tramadol               | 0.363   | 0.077  | 0.002 | 0.125  | 0.110  |
| Venlafaxine            | 0.113   | 0.052  | 0.010 | 0.054  | 0.027  |

(c) Fish

| RQ                     | Max   | Median | Min   | Mean  | Std.  |
|------------------------|-------|--------|-------|-------|-------|
| 1H-benzotriazole       | 0.117 | 0.006  | 0.001 | 0.011 | 0.020 |
| 5-methyl-benzotriazole | 0.028 | 0.002  | 0.001 | 0.004 | 0.005 |
| Atrazine               | 0.024 | 0.003  | 0.001 | 0.005 | 0.005 |
| Bupropion              | 0.163 | 0.052  | 0.011 | 0.059 | 0.034 |
| Carbamazepine          | 0.021 | 0.009  | 0.002 | 0.010 | 0.005 |
| Citalopram             | 0.123 | 0.009  | 0.001 | 0.029 | 0.031 |
| Clothianidin           | 0.001 | 0.001  | 0.001 | 0.001 | 0.000 |
| Desvenlafaxine         | 0.190 | 0.038  | 0.001 | 0.064 | 0.057 |
| Fexofenadine           | 0.004 | 0.002  | 0.001 | 0.002 | 0.001 |
| Imidacloprid           | 0.067 | 0.002  | 0.001 | 0.006 | 0.014 |
| Lidocaine              | 0.008 | 0.003  | 0.001 | 0.003 | 0.002 |
| Metformin              | 0.012 | 0.001  | 0.001 | 0.002 | 0.002 |
| Methocarbamol          | 0.596 | 0.086  | 0.010 | 0.124 | 0.112 |
| Sulfamethoxazole       | 0.025 | 0.004  | 0.001 | 0.006 | 0.006 |
| Thiamethoxam           | 0.001 | 0.001  | 0.001 | 0.001 | 0.000 |
| Tramadol               | 0.045 | 0.010  | 0.001 | 0.016 | 0.014 |
| Venlafaxine            | 0.071 | 0.032  | 0.007 | 0.034 | 0.017 |

**Table S.9:** Inputs of RQs inputs for Monte Carlo simulation. “-” indicated RQ<0.1. Data are based on acute effect and are post log-transformed.

| RQ               | Algae |      | Invertebrate |      | Fish  |      |
|------------------|-------|------|--------------|------|-------|------|
|                  | Mean  | Std. | Mean         | Std. | Mean  | Std. |
| Bupropion        | -0.79 | 0.59 | -1.08        | 0.60 | -     | -    |
| Citalopram       | -1.79 | 1.35 | -2.38        | 1.35 | -     | -    |
| Clothianidin     | -     | -    | 1.78         | 0.75 | -     | -    |
| Desvenlafaxine   | -     | -    | -            | -    | -3.37 | 1.38 |
| Imidacloprid     | -     | -    | 1.91         | 1.49 | -     | -    |
| Lidocaine        | -1.97 | 1.18 | -            | -    | -     | -    |
| Methocarbamol    | -     | -    | -            | -    | -2.43 | 0.83 |
| Sulfamethoxazole | 1.87  | 1.37 | -3.21        | 1.23 | -     | -    |
| Thiamethoxam     | -     | -    | -2.65        | 1.08 | -     | -    |
| Tramadol         | -2.11 | 1.26 | -2.65        | 1.25 | -     | -    |

**Table S.10:** Inputs of stream flow rate inputs at DS2 for Monte Carlo simulation (unit: m<sup>3</sup>/s). Data were post log-transformed.

|                    | Mean  | Std. |
|--------------------|-------|------|
| Baseflow condition | -2.20 | 0.61 |
| All-flow condition | -1.64 | 0.89 |

**Table S.11:** Risk quotients of acute effect from simulations for both baseflow conditions and all-flow conditions.

| RQs                 | Baseflow conditions |       |        |                 |                 | All-flow conditions |        |        |                 |                 |
|---------------------|---------------------|-------|--------|-----------------|-----------------|---------------------|--------|--------|-----------------|-----------------|
|                     | Mean                | std.  | median | 75th percentile | 90th percentile | Mean                | std.   | median | 75th percentile | 90th percentile |
| <b>Algae</b>        |                     |       |        |                 |                 |                     |        |        |                 |                 |
| Bupropion           | 0.53                | 0.34  | 0.44   | 0.67            | 0.93            | 0.54                | 0.88   | 0.27   | 0.59            | 1.24            |
| Citalopram          | 0.44                | 0.88  | 0.18   | 0.45            | 1.06            | 0.50                | 1.98   | 0.10   | 0.36            | 0.98            |
| Lidocaine           | 0.29                | 0.41  | 0.15   | 0.34            | 0.71            | 0.31                | 0.78   | 0.09   | 0.27            | 0.68            |
| Sulfamethoxazole    | 17.21               | 63.55 | 6.17   | 15.36           | 37.29           | 18.18               | 71.11  | 3.73   | 12.36           | 31.98           |
| Tramadol            | 0.25                | 0.48  | 0.12   | 0.27            | 0.53            | 0.25                | 0.75   | 0.06   | 0.20            | 0.55            |
| <b>Invertebrate</b> |                     |       |        |                 |                 |                     |        |        |                 |                 |
| Bupropion           | 0.40                | 0.26  | 0.34   | 0.50            | 0.72            | 0.41                | 0.72   | 0.19   | 0.43            | 0.92            |
| Citalopram          | 0.23                | 0.38  | 0.10   | 0.25            | 0.55            | 0.26                | 0.87   | 0.05   | 0.19            | 0.53            |
| Clothianidin        | 7.90                | 6.69  | 5.81   | 10.37           | 15.83           | 8.09                | 16.31  | 3.62   | 7.61            | 18.72           |
| Imidacloprid        | 21.98               | 59.24 | 6.79   | 18.93           | 46.80           | 28.31               | 179.94 | 3.88   | 15.12           | 46.54           |
| Sulfamethoxazole    | 0.08                | 0.12  | 0.04   | 0.10            | 0.20            | 0.08                | 0.17   | 0.02   | 0.07            | 0.22            |
| Thiamethoxam        | 0.12                | 0.15  | 0.07   | 0.15            | 0.28            | 0.12                | 0.25   | 0.04   | 0.11            | 0.31            |
| Tramadol            | 0.17                | 0.33  | 0.07   | 0.16            | 0.37            | 0.21                | 0.86   | 0.04   | 0.13            | 0.36            |
| <b>Fish</b>         |                     |       |        |                 |                 |                     |        |        |                 |                 |
| Desvenlafaxine      | 0.08                | 0.17  | 0.04   | 0.08            | 0.18            | 0.09                | 0.29   | 0.02   | 0.07            | 0.17            |
| Methocarbamol       | 0.13                | 0.14  | 0.09   | 0.16            | 0.27            | 0.13                | 0.32   | 0.05   | 0.13            | 0.28            |

**Table S.12 (a-c):** RQs of chronic effect from measured field data under baseflow conditions for algae, invertebrate and fish. “-” indicated RQs <10<sup>-4</sup>.

**(a) Algae**

| RQs                           | Max     | Median | Min   | Mean   | Std.   |
|-------------------------------|---------|--------|-------|--------|--------|
| <b>1H-benzotriazole</b>       | 0.028   | 0.002  | 0.001 | 0.003  | 0.005  |
| <b>5-methyl-benzotriazole</b> | 0.003   | 0.001  | 0.001 | 0.001  | 0.001  |
| <b>Clothianidin</b>           | -       | -      | -     | -      | -      |
| <b>imidacloprid</b>           | 200.333 | 2.603  | 0.207 | 14.020 | 36.760 |
| <b>Thiamethoxam</b>           | -       | -      | -     | -      | -      |

**(b) Invertebrate**

| RQs                           | Max   | Median | Min   | Mean  | Std.  |
|-------------------------------|-------|--------|-------|-------|-------|
| <b>1H-benzotriazole</b>       | 0.034 | 0.002  | 0.001 | 0.003 | 0.006 |
| <b>5-methyl-benzotriazole</b> | 0.015 | 0.001  | 0.001 | 0.002 | 0.003 |
| <b>Clothianidin</b>           | 3.314 | 0.439  | 0.124 | 0.696 | 0.662 |
| <b>Imidacloprid</b>           | 0.003 | 0.002  | 0.001 | 0.002 | 0.001 |
| <b>Thiamethoxam</b>           | 1.460 | 0.042  | 0.004 | 0.116 | 0.222 |

**(c) Fish**

| RQs                           | Max   | Median | Min   | Mean  | Std. |
|-------------------------------|-------|--------|-------|-------|------|
| <b>1H-benzotriazole</b>       | 0.001 | 0.001  | 0.001 | 0.001 | -    |
| <b>5-methyl-benzotriazole</b> | 0.001 | 0.001  | 0.001 | 0.001 | -    |
| <b>Clothianidin</b>           | -     | -      | -     | -     | -    |
| <b>Imidacloprid</b>           | -     | -      | -     | -     | -    |
| <b>Thiamethoxam</b>           | -     | -      | -     | -     | -    |

**Table S.13:** Inputs of RQs inputs for Monte Carlo simulation. “-” indicated RQ<0.1. Data are based on chronic effect and are post log-transformed.

| RQ                     | Algae |      | Invertebrate |      | Fish |      |
|------------------------|-------|------|--------------|------|------|------|
|                        | Mean  | Std. | Mean         | Std. | Mean | Std. |
| 1H-benzotriazole       | -     | -    | -            | -    | -    | -    |
| 5-methyl-benzotriazole | -     | -    | -            | -    | -    | -    |
| Clothianidin           | -     | -    | -0.68        | 0.75 | -    | -    |
| Imidacloprid           | 1.22  | 1.49 | -            | -    | -    | -    |
| Thiamethoxam           | -     | -    | -2.88        | 1.09 | -    | -    |

**Table S.14:** Risk quotients of chronic effect from simulations for both baseflow conditions and all-flow conditions.

| RQs                 | Baseflow conditions |       |        |                 |                 | All-flow conditions |       |        |                 |                 |
|---------------------|---------------------|-------|--------|-----------------|-----------------|---------------------|-------|--------|-----------------|-----------------|
|                     | Mean                | std.  | median | 75th percentile | 90th percentile | Mean                | std.  | median | 75th percentile | 90th percentile |
| <b>Algae</b>        |                     |       |        |                 |                 |                     |       |        |                 |                 |
| Imidacloprid        | 10.56               | 32.44 | 3.49   | 9.24            | 24.00           | 10.46               | 38.05 | 2.05   | 6.78            | 20.07           |
| <b>Invertebrate</b> |                     |       |        |                 |                 |                     |       |        |                 |                 |
| Clothianidin        | 0.71                | 0.60  | 0.54   | 0.89            | 1.45            | 0.66                | 1.28  | 0.30   | 0.70            | 1.54            |
| Thiamethoxam        | 0.10                | 0.14  | 0.05   | 0.11            | 0.22            | 0.10                | 0.21  | 0.03   | 0.09            | 0.23            |

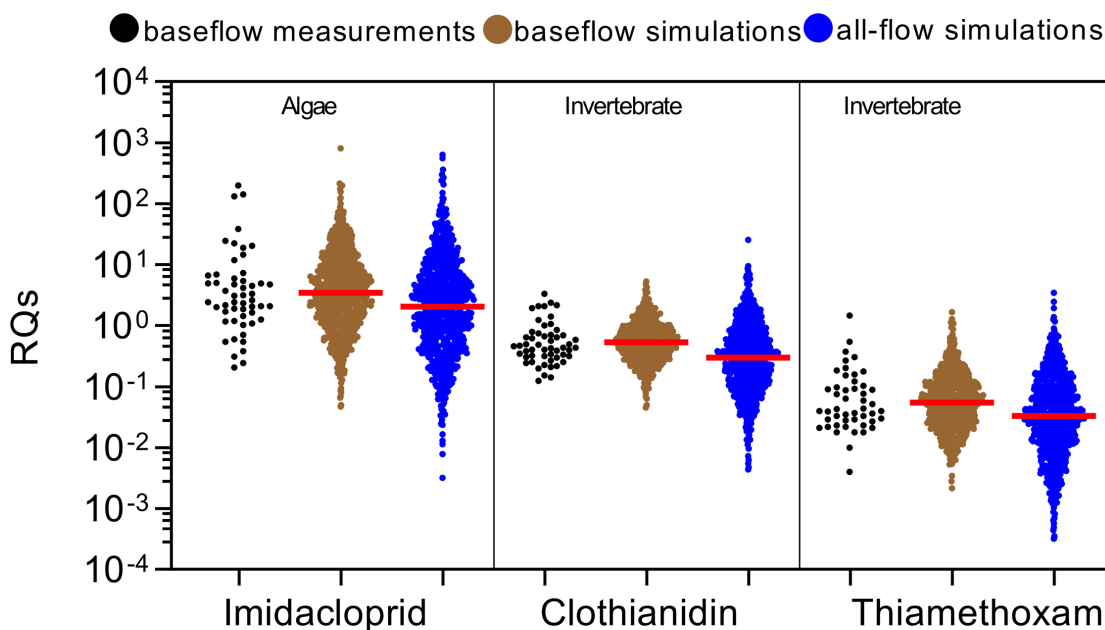

**Figure S.7:** Measured and simulated risk quotients (RQs) of chronic effect for stochastic risk modeling. Measured values occurred under baseflow conditions, whereas the simulated conditions were generated via Monte Carlo simulations for baseflow and all flows during the two-year sampling period (flows determined at site DS2 using the USGS flow gage). Red solid lines represent median values for each data set. Compounds were selected for stochastic risk simulation when the 75th percentile of the total measured RQs under baseflow conditions exceeded the lowest problematic risk level (i.e., RQ=0.1) for at least one of the three different aquatic species types (i.e., algae, invertebrates, fish). Only imidacloprid exhibited medium or higher risks to algae, and only two compound clothianidin and thiamethoxam exhibited medium or higher risks to invertebrate.

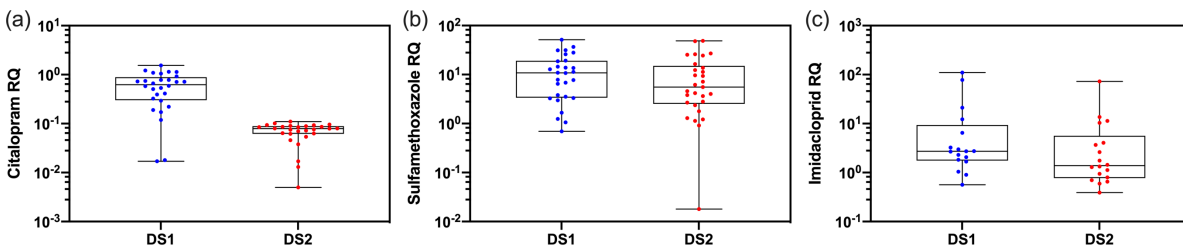

**Figure S.8:** Risk quotients (RQs) comparison of pharmaceutical (a) citalopram, (b) sulfamethoxazole and (c) imidacloprid from baseflow measurements at sites DS1 and DS2 in Muddy Creek (Coralville, Iowa). For citalopram, a rapidly-attenuated compound in the stream, the RQs at DS1 were significantly higher than RQs at DS2 ( $p < 0.0001$ ), whereas for other two compounds, the RQs at DS1 were not significantly different from RQs at DS2 ( $p > 0.05$ ). The box and whiskers from bottom to top represent minimum value, 25th percentile, median value, 75th percentile and maximum value.

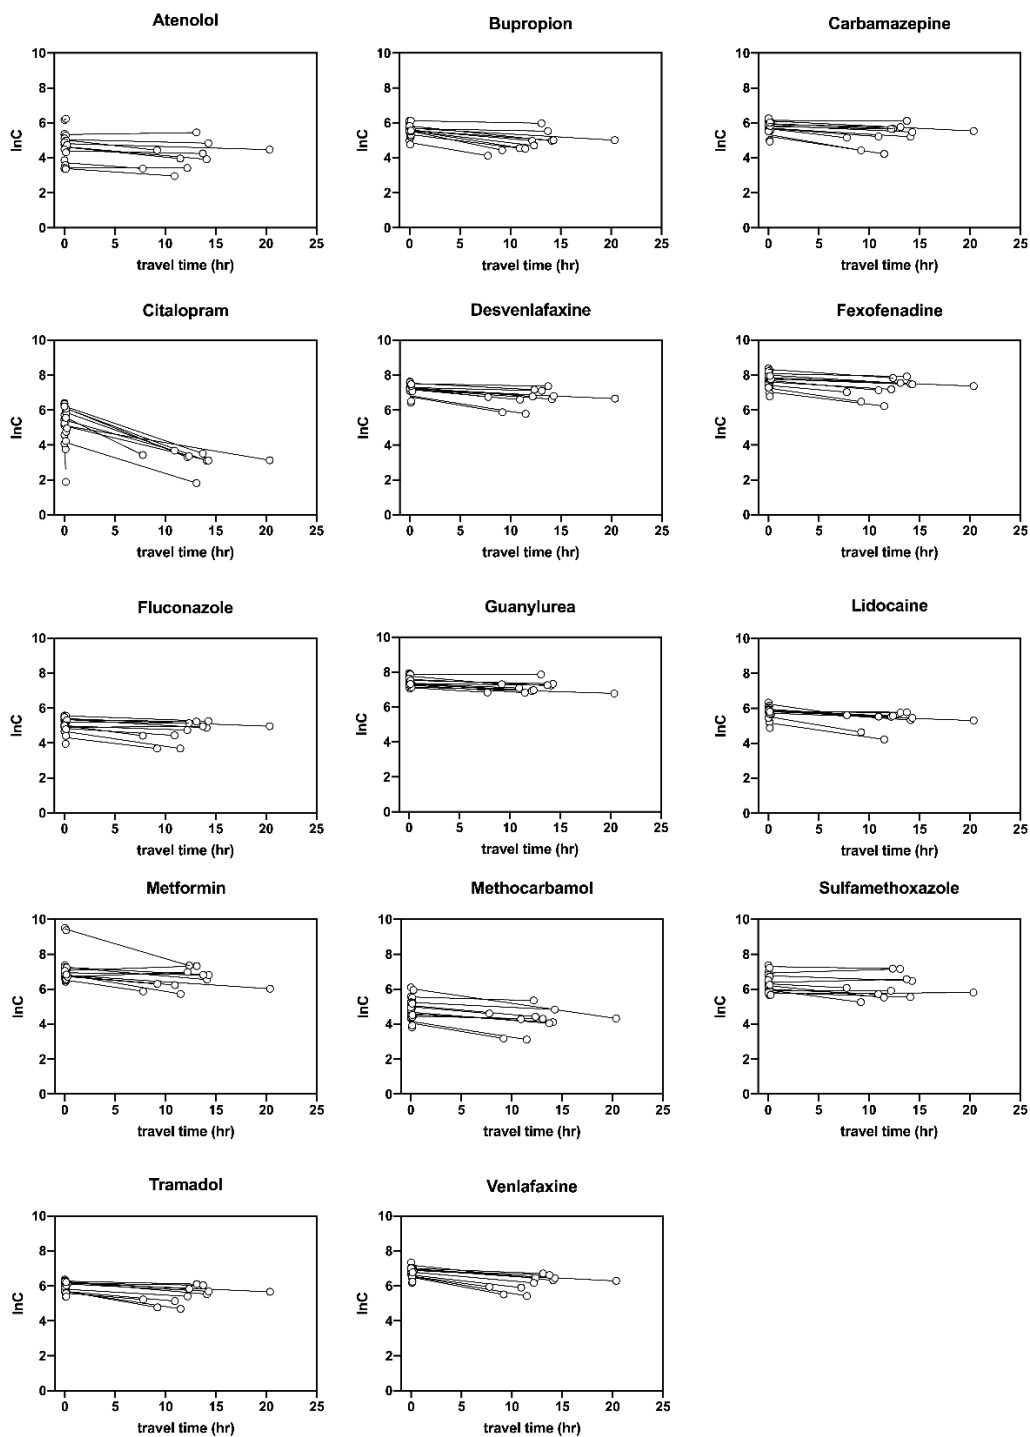

**Figure S.9:** The first order in-stream attenuation of pharmaceutical compounds. Black open circles represent individual field measurement. Each slope represents the rate constant for each sampling set during September 2017–August 2018.<sup>2</sup> All the rate constants can be found in Table S.6. The x-axis is the travel time calculated based on travel distance and measured flow velocity.<sup>2</sup> Stream stage at DS2 was continuously monitored by the USGS gaging station (05454090) to calculate flow based on a stage/discharge rating curve developed for this specific site.<sup>55</sup> The estimated width of the streambed at DS2 is 4 m.

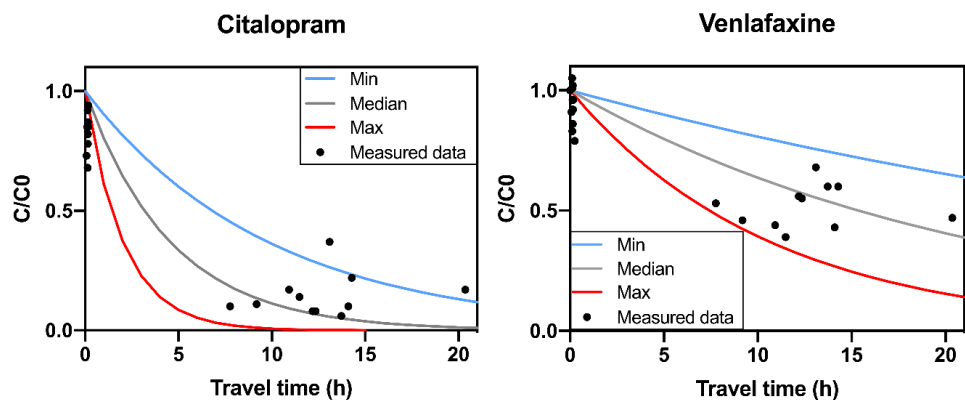

**Figure S.10:** Model calibration and validation for pharmaceuticals citalopram and venlafaxine. U.S. Geological Survey monthly data collected from Muddy Creek (Coralville, Iowa) during Year 1 were used for model calibration. Simulation results are based on the maximum, median and minimum rate constants. University of Iowa monthly data during Year 1 (September 2017 – August 2018) were used for model validation, shown as ‘measured data’ here in the figure.

**Table S.15:** Stream flow data provided by U.S. Geological Survey during September 2017 to August 2018.<sup>2</sup> \* indicates water was frozen, so the measurement is questionable. # indicates estimated value by U.S. Geological Survey; the streamflow measurement for US1 for January was inadvertently deleted prior to formal documentation and was estimated by using available streamflow measurements from the December 2017 (US1 and DS1) to January 2018 (DS1) and by comparing photos from December 2017 and January 2018 at US1. The median estimated travel time to Iowa River is 37.91h.

| Date       | DS1                           |                |                           | DS2                           |            |                          |                           | Estimated travel time to Iowa River (h) |
|------------|-------------------------------|----------------|---------------------------|-------------------------------|------------|--------------------------|---------------------------|-----------------------------------------|
|            | Flow rate (m <sup>3</sup> /s) | Velocity (m/s) | Estimated travel time (h) | Flow rate (m <sup>3</sup> /s) | Height (m) | Estimated velocity (m/s) | Estimated travel time (h) |                                         |
| 2017/9/7   | 0.083                         | 0.21           | 0.13                      | 0.048                         | 0.67       | 0.018                    | 12.35                     | 43                                      |
| 2017/10/2  | 0.065                         | 0.18           | 0.15                      | 0.054                         | 0.68       | 0.020                    | 13.72                     | 41                                      |
| 2017/11/2  | 0.050                         | 0.11           | 0.25                      | 0.072                         | 0.71       | 0.025                    | 20.36                     | 42                                      |
| 2017/12/11 | 0.094                         | 0.18           | 0.16                      | 0.051                         | 0.70       | 0.018                    | 14.28                     | 45                                      |
| 2018/1/8   | 0.10 <sup>#</sup>             | 0.22           | 0.12                      | 0.033 <sup>*</sup>            | 0.68       | NA                       | NA                        | NA                                      |
| 2018/2/5   | 0.086                         | 0.19           | 0.14                      | 0.060                         | 0.74       | 0.022                    | 13.09                     | 38                                      |
| 2018/3/8   | 0.18                          | 0.20           | 0.14                      | 0.15                          | 0.76       | 0.049                    | 11.49                     | 23                                      |
| 2018/4/2   | 0.18                          | 0.25           | 0.11                      | 0.17                          | 0.72       | 0.058                    | 9.19                      | 19                                      |
| 2018/5/1   | 0.10                          | 0.17           | 0.17                      | 0.094                         | 0.68       | 0.033                    | 14.10                     | 31                                      |
| 2018/6/14  | 0.12                          | 0.24           | 0.12                      | 0.057                         | 0.67       | 0.021                    | 10.92                     | 37                                      |
| 2018/7/12  | 0.12                          | 0.34           | 0.08                      | 0.068                         | 0.66       | 0.025                    | 7.77                      | 29                                      |
| 2018/8/1   | 0.076                         | 0.21           | 0.13                      | 0.051                         | 0.67       | 0.019                    | 12.18                     | 41                                      |



**Table S.16:** Estimation of pharmaceutical attenuation in Muddy Creek and attenuation percentage when Muddy Creek enters Iowa River. Median travel time from WWTP outfall to Iowa River is 37.91 h.

| Chemical         | Rate constant $\pm$ standard error (median, h <sup>-1</sup> ) | C <sub>Iowa River</sub> /C <sub>Effluent</sub> $\pm$ standard deviation | Attenuation percentage | Half-life (h) |
|------------------|---------------------------------------------------------------|-------------------------------------------------------------------------|------------------------|---------------|
| Atenolol         | 0.0187 $\pm$ 0.0040                                           | 0.38 $\pm$ 0.15                                                         | 62%                    | 37            |
| Bupropion        | 0.0554 $\pm$ 0.0040                                           | 0.18 $\pm$ 0.20                                                         | 82%                    | 12            |
| Carbamazepine    | 0.0291 $\pm$ 0.0023                                           | 0.39 $\pm$ 0.23                                                         | 61%                    | 24            |
| Citalopram       | 0.219 $\pm$ 0.0172                                            | 0                                                                       | 100%                   | 3             |
| Desvenlafaxine   | 0.0348 $\pm$ 0.0022                                           | 0.29 $\pm$ 0.15                                                         | 71%                    | 20            |
| Fexofenadine     | 0.0295 $\pm$ 0.0008                                           | 0.32 $\pm$ 0.14                                                         | 68%                    | 24            |
| Fluconazole      | 0.0242 $\pm$ 0.0047                                           | 0.45 $\pm$ 0.24                                                         | 55%                    | 29            |
| Guanylurea       | 0.0172 $\pm$ 0.0094                                           | 0.43 $\pm$ 0.20                                                         | 57%                    | 40            |
| Lidocaine        | 0.0227 $\pm$ 0.0036                                           | 0.38 $\pm$ 0.22                                                         | 62%                    | 30            |
| Metformin        | 0.0399 $\pm$ 0.0038                                           | 0.19 $\pm$ 0.27                                                         | 81%                    | 17            |
| Methocarbamol    | 0.0362 $\pm$ 0.0175                                           | 0.33 $\pm$ 0.20                                                         | 67%                    | 19            |
| Sulfamethoxazole | 0.0098 $\pm$ 0.0039                                           | 0.47 $\pm$ 0.15                                                         | 53%                    | 71            |
| Tramadol         | 0.0283 $\pm$ 0.0019                                           | 0.29 $\pm$ 0.15                                                         | 71%                    | 24            |
| Venlafaxine      | 0.0451 $\pm$ 0.0021                                           | 0.17 $\pm$ 0.11                                                         | 83%                    | 15            |

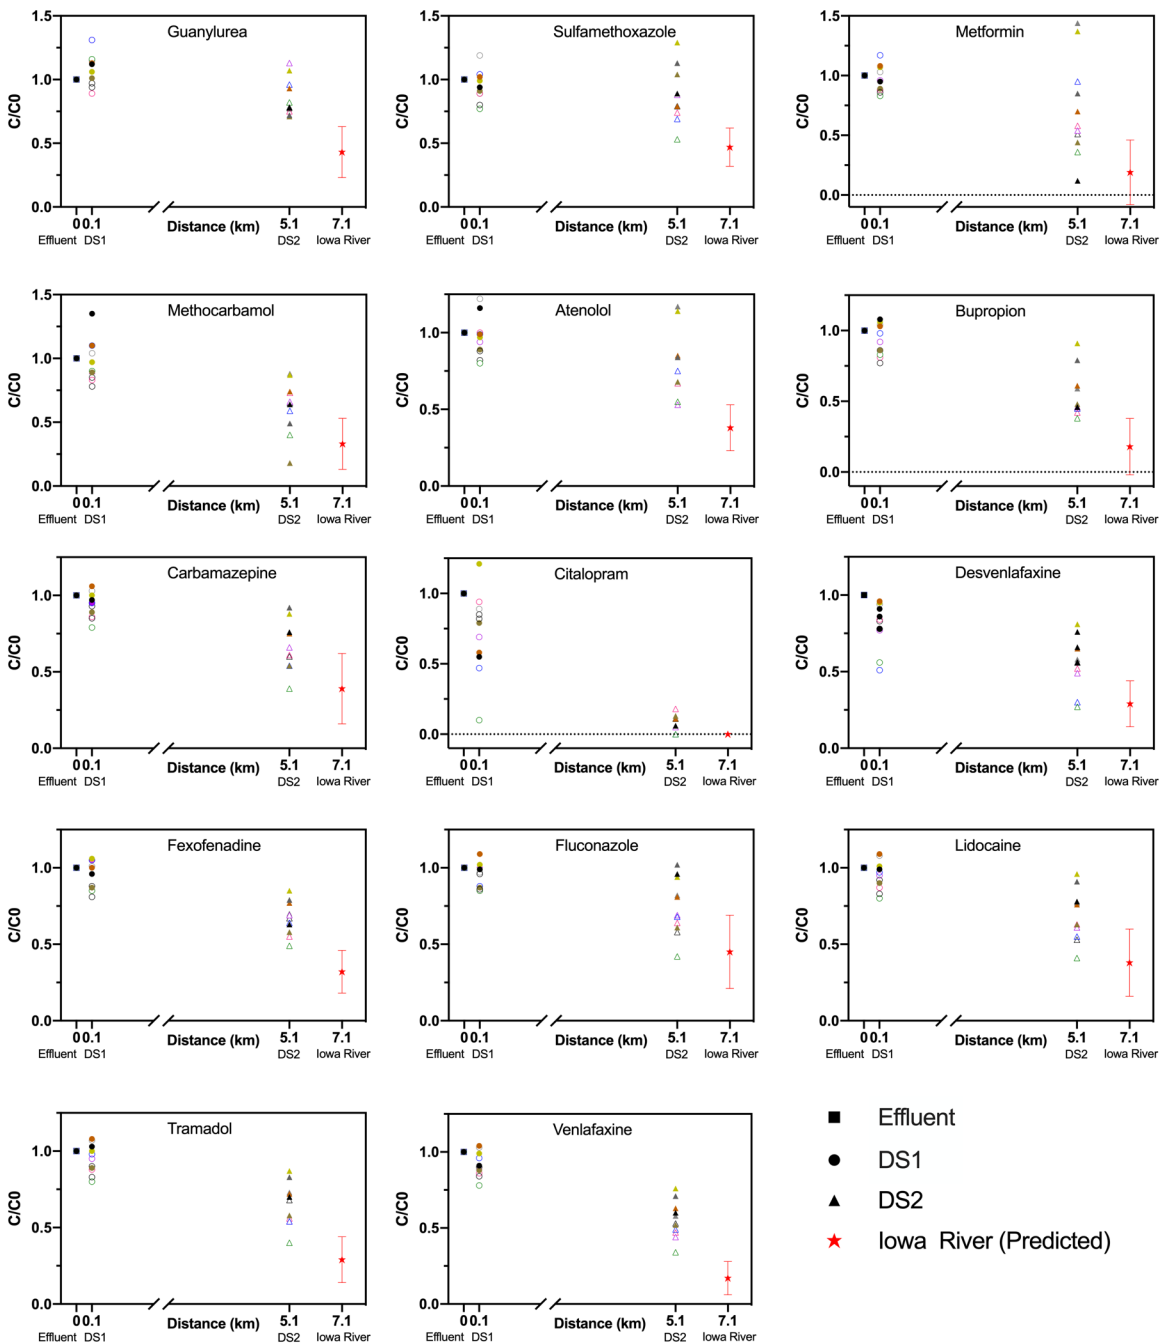

**Figure S.11:** Measured (Effluent, DS1, DS2 in Muddy Creek, Iowa) and predicted concentrations (Iowa River) of pharmaceuticals and industrial chemicals in the effluent and along the stream reach. The red star with standard error bar is the predicted concentration at the confluence of Muddy Creek and the Iowa River based on the rate constant, it also corresponds the location of the red star in Fig. 1. in the manuscript, whereas other data points at a given location are individual sampling dates measured results during Year 1. The red star is the predicted concentration ratio at the end of the stream reach, at the confluence of Muddy Creek and the Iowa river and corresponds to the location of the red star in Fig. 1. Different shapes represent corresponding sampling locations. Different colors represent different sampling date.

**Table S.17:** Rate constants  $\pm$  standard error (unit:  $\text{h}^{-1}$ ) of each monthly sampling set at three sites (effluent, DS1 and DS2) during September 2017 to August 2018.<sup>2</sup>

| Chemical         | Sep (2017)             | Oct (2017)                   | Nov (2017)                   | Dec (2017)             | Jan (2018) | Feb (2018)                   | Mar (2018)             | Apr (2018)             | May (2018)                  | Jun (2018)             | Jul (2018)             | Aug (2018)                   | Median                 |
|------------------|------------------------|------------------------------|------------------------------|------------------------|------------|------------------------------|------------------------|------------------------|-----------------------------|------------------------|------------------------|------------------------------|------------------------|
| Atenolol         | -1.154*#               | 0.0132<br>$\pm 0.0061$       | 0.0187<br>$\pm 0.0040$       | 0.0112<br>$\pm 0.0004$ | NA         | -0.0099<br>$\pm 0.0017^{\#}$ | 0.0525<br>$\pm 0.0137$ | 0.0316<br>$\pm 0.0005$ | 0.0454<br>$\pm 0.0026$      | 0.0366<br>$\pm 0.0003$ | 0.0517<br>$\pm 0.0169$ | -0.0125<br>$\pm 0.0115^{\#}$ | 0.0187<br>$\pm 0.0040$ |
| Bupropion        | 0.0623<br>$\pm 0.0050$ | 0.0177<br>$\pm 0.0133$       | 0.0364<br>$\pm 0.0049$       | 0.0350<br>$\pm 0.0018$ | NA         | 0.0068<br>$\pm 0.0028$       | 0.0846<br>$\pm 0.0110$ | 0.0882<br>$\pm 0.0008$ | 0.0554<br>$\pm 0.0040$      | 0.0790<br>$\pm 0.0130$ | 0.1019<br>$\pm 0.0129$ | 0.0443<br>$\pm 0.0027$       | 0.0554<br>$\pm 0.0040$ |
| Carbamazepine    | 0.0219<br>$\pm 0.0016$ | 0.0060<br>$\pm 0.0087$       | 0.0300<br>$\pm 0.0039$       | 0.0203<br>$\pm 0.0031$ | NA         | 0.0099<br>$\pm 0.0001$       | 0.0829<br>$\pm 0.0141$ | 0.0675<br>$\pm 0.0033$ | 0.0291<br>$\pm 0.0023$      | 0.0459<br>$\pm 0.0094$ | 0.0657<br>$\pm 0.0059$ | 0.0065<br>$\pm 0.0018$       | 0.0291<br>$\pm 0.0023$ |
| Citalopram       | 0.2256<br>$\pm 0.0321$ | 0.2020<br>$\pm 0.0087$       | 0.1018<br>$\pm 0.0075$       | 0.1538<br>$\pm 0.0255$ | NA         | 0.1694<br>$\pm 0.0115$       | 0.3715<br>$\pm 0.1414$ | 0.4917<br>$\pm 0.0536$ | 0.2187<br>$\pm 0.0172$      | 0.1594<br>$\pm 0.0026$ | 0.2846<br>$\pm 0.0134$ | 0.2316<br>$\pm 0.0046$       | 0.2187<br>$\pm 0.0172$ |
| Desvenlafaxine   | 0.0284<br>$\pm 0.0015$ | 0.0162<br>$\pm 0.0102$       | 0.0271<br>$\pm 0.0039$       | 0.0231<br>$\pm 0.0036$ | NA         | 0.0115<br>$\pm 0.0006$       | 0.0855<br>$\pm 0.0140$ | 0.0676<br>$\pm 0.0048$ | 0.0348<br>$\pm 0.0022$      | 0.0551<br>$\pm 0.0067$ | 0.0632<br>$\pm 0.0096$ | 0.0353<br>$\pm 0.0032$       | 0.0348<br>$\pm 0.0022$ |
| Fexofenadine     | 0.0381<br>$\pm 0.0020$ | 0.0177<br>$\pm 0.0107$       | 0.02271<br>$\pm 0.0046$      | 0.0189<br>$\pm 0.0001$ | NA         | 0.0122<br>$\pm 0.0033$       | 0.0620<br>$\pm 0.0099$ | 0.0489<br>$\pm 0.0043$ | 0.0255<br>$\pm 0.0027$      | 0.0551<br>$\pm 0.0099$ | 0.0517<br>$\pm 0.0115$ | 0.0295<br>$\pm 0.0008$       | 0.0295<br>$\pm 0.0008$ |
| Fluconazole      | 0.0032<br>$\pm 0.0005$ | -0.0013<br>$\pm 0.0077^{\#}$ | 0.0242<br>$\pm 0.0047$       | 0.0153<br>$\pm 0.0041$ | NA         | 0.0053<br>$\pm 0.0011$       | 0.0768<br>$\pm 0.0092$ | 0.0426<br>$\pm 0.0096$ | 0.0255<br>$\pm 0.0012$      | 0.0414<br>$\pm 0.0100$ | 0.0708<br>$\pm 0.0031$ | 0.0164<br>$\pm 0.0016$       | 0.0242<br>$\pm 0.0047$ |
| Guanylurea       | 0.0193<br>$\pm 0.0064$ | 0.0241<br>$\pm 0.0029$       | 0.0172<br>$\pm 0.0005$       | 0.0048<br>$\pm 0.0060$ | NA         | -0.0046 <sup>#</sup>         | 0.0172<br>$\pm 0.0094$ | 0.0040<br>$\pm 0.0208$ | 0.0087<br>$\pm 0.0135^{\#}$ | 0.0258<br>$\pm 0.0076$ | 0.0322<br>$\pm 0.0025$ | 0.0220<br>$\pm 0.0083$       | 0.0172<br>$\pm 0.0094$ |
| Lidocaine        | 0.0194<br>$\pm 0.0004$ | 0.0074<br>$\pm 0.0097$       | 0.0227<br>$\pm 0.0036$       | 0.0188<br>$\pm 0.0041$ | NA         | 0.0030<br>$\pm 0.0006$       | 0.0777<br>$\pm 0.0135$ | 0.0642<br>$\pm 0.0018$ | 0.0348<br>$\pm 0.0022$      | 0.0423<br>$\pm 0.0087$ | 0.0812<br>$\pm 0.0067$ | 0.0213<br>$\pm 0.0042$       | 0.0227<br>$\pm 0.0036$ |
| Metformin        | 0.1693<br>$\pm 0.0022$ | 0.0125<br>$\pm 0.0076$       | 0.0399<br>$\pm 0.0038$       | 0.0252<br>$\pm 0.0037$ | NA         | -0.0237<br>$\pm 0.0036^{\#}$ | 0.0898<br>$\pm 0.0109$ | 0.0052<br>$\pm 0.0124$ | 0.0433<br>$\pm 0.0016$      | 0.0505<br>$\pm 0.0074$ | 0.0877<br>$\pm 0.0103$ | -0.0304<br>$\pm 0.0015^{\#}$ | 0.0399<br>$\pm 0.0038$ |
| Methocarbamol    | 0.0362<br>$\pm 0.0175$ | 0.0527<br>$\pm 0.0125$       | 0.0855<br>$\pm 0.0034$       | 0.0209<br>$\pm 0.0046$ | NA         | 0.0107<br>$\pm 0.0015$       | 0.0793<br>$\pm 0.0061$ | 0.0564<br>$\pm 0.0082$ | 0.0299<br>$\pm 0.0048$      | 0.0295<br>$\pm 0.0114$ | 0.0556<br>$\pm 0.0142$ | 0.0106<br>$\pm 0.0024$       | 0.0362<br>$\pm 0.0175$ |
| Sulfamethoxazole | 0.0098<br>$\pm 0.0039$ | -0.0086<br>$\pm 0.0114^{\#}$ | -0.0019<br>$\pm 0.0031^{\#}$ | 0.0161<br>$\pm 0.0011$ | NA         | -0.0199<br>$\pm 0.0007^{\#}$ | 0.0551<br>$\pm 0.0155$ | 0.0402<br>$\pm 0.0034$ | 0.0092<br>$\pm 0.0021$      | 0.0285<br>$\pm 0.0069$ | 0.0310<br>$\pm 0.0098$ | -0.0100<br>$\pm 0.0104^{\#}$ | 0.0098<br>$\pm 0.0039$ |
| Tramadol         | 0.0283<br>$\pm 0.0019$ | 0.0140<br>$\pm 0.0092$       | 0.0271<br>$\pm 0.0036$       | 0.0230<br>$\pm 0.0041$ | NA         | 0.0107<br>$\pm 0.0001$       | 0.0803<br>$\pm 0.0129$ | 0.0675<br>$\pm 0.0010$ | 0.0440<br>$\pm 0.0021$      | 0.0542<br>$\pm 0.0080$ | 0.0490<br>$\pm 0.0087$ | 0.0262<br>$\pm 0.0043$       | 0.0283<br>$\pm 0.0019$ |
| Venlafaxine      | 0.0422<br>$\pm 0.0048$ | 0.0249<br>$\pm 0.0091$       | 0.0325<br>$\pm 0.0042$       | 0.0322<br>$\pm 0.0017$ | NA         | 0.0214<br>$\pm 0.0004$       | 0.0934<br>$\pm 0.0146$ | 0.0773<br>$\pm 0.0032$ | 0.0575<br>$\pm 0.0045$      | 0.0697<br>$\pm 0.0092$ | 0.0812<br>$\pm 0.0085$ | 0.0451<br>$\pm 0.0021$       | 0.0451<br>$\pm 0.0021$ |

Note: NA indicates that the flow rate at DS2 in January was not available due to the water was ice-affected at DS2. \* indicates that chemical at DS2 was not detected, thus only two data points (one in the effluent and the other one at DS1) was fitted into the first-order kinetics equation. # indicates higher concentrations were detected in either DS1 or DS2 compared to Effluent.

**Table S.18:** Human health benchmark concentration (HHBs) of emerging contaminants.<sup>56</sup> For the majority of pharmaceuticals, there are no HHBs applicable/available.

| Chemical                  | Human risk limits (HRLs, µg/L) | Health based values (HBVs, µg/L) | Risk assessment advice (RAA, µg/L) |
|---------------------------|--------------------------------|----------------------------------|------------------------------------|
| Atrazine                  | 3                              | –                                | –                                  |
| 1H-benzotriazole          | –                              | 20                               | –                                  |
| 5-methyl-1H-benzotriazole | –                              | –                                | 20                                 |
| Carbamazepine             | 40                             | –                                | –                                  |
| Clothianidin              | 200                            | –                                | –                                  |
| Desvenlafaxine            | –                              | 20                               | –                                  |
| Imidacloprid              | –                              | 3;100                            | –                                  |
| Sulfamethoxazole          | –                              | –                                | 100                                |
| Thiamethoxam              | 200;400                        | –                                | –                                  |
| Venlafaxine               | –                              | 10                               | –                                  |

## References

- 1 H. Zhi, D. W. Kolpin, R. D. Klaper, L. R. Iwanowicz, S. M. Meppelink and G. H. LeFevre, Occurrence and spatiotemporal dynamics of pharmaceuticals in a temperate-region wastewater effluent-dominated stream: variable inputs and differential attenuation yield evolving complex exposure mixtures, *Environ. Sci. Technol.*, 2020, **54**, 12967–12978.
- 2 S. M. Meppelink, D. W. Kolpin, R. F. Lane, L. R. Iwanowicz, H. Zhi and G. H. LeFevre, *Water-quality data for a pharmaceutical study at Muddy Creek in North Liberty and Coralville, Iowa, 2017-2018: U.S. Geological Survey data release*, 2020.
- 3 D. T. Webb, H. Zhi, D. W. Kolpin, R. D. Klaper, L. R. Iwanowicz and G. H. LeFevre, Emerging investigator series: municipal wastewater as a year-round point source of neonicotinoid insecticides that persist in an effluent-dominated stream, *Environ. Sci. Process. Impacts*, 2021, **23**, 678–688.
- 4 U.S. EPA, US Environmental Protection Agency’s Estimation Program Interface Suite, <https://www.epa.gov/tsca-screening-tools>, (accessed 8 November 2020).
- 5 U.S. EPA, CompTox Chemistry Dashboard., <https://comptox.epa.gov/dashboard>, (accessed 12 August 2020).
- 6 J. W. Kwon and K. L. Armbrust, Degradation of citalopram by simulated sunlight, *Environ. Toxicol. Chem.*, 2005, **24**, 1618–1623.
- 7 P. C. Rúa-Gómez and W. Püttmann, Degradation of lidocaine, tramadol, venlafaxine and the metabolites O-desmethyltramadol and O-desmethylvenlafaxine in surface waters, *Chemosphere*, 2013, **90**, 1952–1959.
- 8 F. J. O. Quintão, J. R. L. Freitas, C. de Fátima Machado, S. F. Aquino, S. de Queiroz Silva and R. J. de Cássia Franco Afonso, Characterization of metformin by-products under photolysis, photocatalysis, ozonation and chlorination by high-performance liquid chromatography coupled to high-resolution mass spectrometry, *Rapid Commun. Mass Spectrom.*, 2016, **30**, 2360–2368.
- 9 C. Trautwein and K. Kümmerer, Incomplete aerobic degradation of the antidiabetic drug Metformin and identification of the bacterial dead-end transformation product Guanylurea, *Chemosphere*, 2011, **85**, 765–773.
- 10 Z. F. Chen, G. G. Ying, Y. X. Jiang, B. Yang, H. J. Lai, Y. S. Liu, C. G. Pan and F. Q. Peng, Photodegradation of the azole fungicide fluconazole in aqueous solution under UV-254: Kinetics, mechanistic investigations and toxicity evaluation, *Water Res.*, 2014, **52**, 83–91.
- 11 H. Santoke, W. Song, W. J. Cooper and B. M. Peake, Advanced oxidation treatment and photochemical fate of selected antidepressant pharmaceuticals in solutions of Suwannee River humic acid, *J. Hazard. Mater.*, 2012, **217–218**, 382–390.

- 12 U.S. EPA, Final report: the environmental occurrence, fate, and ecotoxicity of selective serotonin reuptake inhibitors (SSRIs) in aquatic environments, [https://cfpub.epa.gov/ncer\\_abstracts/index.cfm/fuseaction/display.abstractDetail/abstract/1755/report/F](https://cfpub.epa.gov/ncer_abstracts/index.cfm/fuseaction/display.abstractDetail/abstract/1755/report/F), (accessed 20 August 2020).
- 13 H. Yamamoto, Y. Nakamura, S. Moriguchi, Y. Nakamura, Y. Honda, I. Tamura, Y. Hirata, A. Hayashi and J. Sekizawa, Persistence and partitioning of eight selected pharmaceuticals in the aquatic environment: Laboratory photolysis, biodegradation, and sorption experiments, *Water Res.*, 2009, **43**, 351–362.
- 14 K. M. Blum, S. H. Norström, O. Golovko, R. Grabic, J. D. Järhult, O. Koba and H. Söderström Lindström, Removal of 30 active pharmaceutical ingredients in surface water under long-term artificial UV irradiation, *Chemosphere*, 2017, **176**, 175–182.
- 15 R. Andreatti, R. Marotta and N. Paxéus, Pharmaceuticals in STP effluents and their solar photodegradation in aquatic environment, *Chemosphere*, 2003, **50**, 1319–1330.
- 16 C. Weidauer, C. Davis, J. Raeke, B. Seiwert and T. Reemtsma, Sunlight photolysis of benzotriazoles - Identification of transformation products and pathways, *Chemosphere*, 2016, **154**, 416–424.
- 17 S. Kim, J. Chen, T. Cheng, A. Gindulyte, J. He, S. He, Q. Li, B. A. Shoemaker, P. A. Thiessen, B. Yu, L. Zaslavsky, J. Zhang and E. E. Bolton, PubChem 2019 update: improved access to chemical data., *Nucleic Acids Res.*, **47**, D1102–D1109.
- 18 S. Chapra, G. Pelletier and H. Tao, QUAL2K: A modeling framework for simulating river and stream water quality (version 2.11), [http://a.aqcl.d.edu/archives/2016/www.hydroasia.org/jahia/webdav/site/hydroasia/shared/COURSES/DATA/2015/Session2/Q2KDocv2\\_11b8Master.pdf](http://a.aqcl.d.edu/archives/2016/www.hydroasia.org/jahia/webdav/site/hydroasia/shared/COURSES/DATA/2015/Session2/Q2KDocv2_11b8Master.pdf), (accessed 1 August 2020).
- 19 O. Golovko, A.-L. Rehl, S. Köhler and L. Ahrens, Organic micropollutants in water and sediment from Lake Mälaren, Sweden, *Chemosphere*, 2020, **258**, 127293.
- 20 C. Leboulanger, F. Rimet, M. Hème De Lacotte and A. Bérard, Effects of atrazine and nicosulfuron on freshwater microalgae, *Environ. Int.*, 2001, **26**, 131–135.
- 21 European Commission, Regulation for Registration, Evaluation, Authorisation and Restriction of Chemicals (REACH), <https://echa.europa.eu/>, (accessed 12 January 2021).
- 22 E. M. Hartgers, G. H. Aalderink, P. J. Van Den Brink, R. Gylstra, J. W. F. Wiegman and T. C. M. Brock, Ecotoxicological threshold levels of a mixture of herbicides (atrazine, diuron and metolachlor) in freshwater microcosms, *Aquat. Ecol.*, 1998, **32**, 135–152.
- 23 K. Ralston-Hooper, J. Hardy, L. Hahn, H. Ochoa-Acuña, L. S. Lee, R. Mollenhauer and M. S. Sepúlveda, Acute and chronic toxicity of atrazine and its metabolites deethylatrazine and deisopropylatrazine on aquatic organisms, *Ecotoxicology*, 2009, **18**, 899–905.
- 24 Y. L. Phyu, M. S. J. Warne and R. P. Lim, Toxicity and bioavailability of atrazine and molinate to the freshwater fish (*Melanotenia fluviatilis*) under laboratory and simulated field conditions, *Sci. Total Environ.*, 2006, **356**, 86–99.
- 25 Z. Dong, D. B. Senn, R. E. Moran and J. P. Shine, Prioritizing environmental risk of prescription pharmaceuticals, *Regul. Toxicol. Pharmacol.*, 2013, **65**, 60–67.
- 26 M. B. Franco, T. S. Andrade, D. Sousa-Moura, M. Lopes da Silva, I. B. Machado Ferraz, N. S. Camargo, I. Domingues, R. Oliveira and C. K. Grisolia, Exposure to dilute concentrations of bupropion affects zebrafish early life stages, *Chemosphere*, 2019, **222**, 175–183.
- 27 R. Aalizadeh, P. C. von der Ohe and N. S. Thomaidis, Prediction of acute toxicity of emerging contaminants on the water flea *Daphnia magna* by Ant Colony

- Optimization–Support Vector Machine QSTR models, *Environ. Sci. Process. Impacts*, 2017, **19**, 438–448.
- 28 C. Australia, Evaluation of the new active CLOTHIANIDIN in the products Sumitomo Shield Systemic Insecticide Sumitomo Samurai Systemic Insecticide Sumitomo Stealth Systemic Insecticide Australian Pesticides and Veterinary Medicines Authority.
- 29 M. C. Cavallaro, C. A. Morrissey, J. V. Headley, K. M. Peru and K. Liber, Comparative chronic toxicity of imidacloprid, clothianidin, and thiamethoxam to *Chironomus dilutus* and estimation of toxic equivalency factors, *Environ. Toxicol. Chem.*, 2017, **36**, 372–382.
- 30 U. FDA, CENTER FOR DRUG EVALUATION AND RESEARCH APPLICATION NUMBER: 201373Orig1s000 ENVIRONMENTAL ASSESSMENT, [https://www.accessdata.fda.gov/drugsatfda\\_docs/nda/2011/201373Orig1s000EA.pdf](https://www.accessdata.fda.gov/drugsatfda_docs/nda/2011/201373Orig1s000EA.pdf), (accessed 12 August 2020).
- 31 M. Y. Song, J. D. Stark and J. J. Brown, Comparative toxicity of four insecticides, including imidacloprid and tebufenozide, to four aquatic arthropods, *Environ. Toxicol. Chem.*, 1997, **16**, 2494–2500.
- 32 J. C. Anderson, C. Dubetz and V. P. Palace, Neonicotinoids in the Canadian aquatic environment: A literature review on current use products with a focus on fate, exposure, and biological effects, *Sci. Total Environ.*, 2015, **505**, 409–422.
- 33 X. D. Chen, E. Culbert, V. Hebert and J. D. Stark, Mixture effects of the nonylphenyl polyethoxylate, R-11 and the insecticide, imidacloprid on population growth rate and other parameters of the crustacean, *Ceriodaphnia dubia*, *Ecotoxicol. Environ. Saf.*, 2010, **73**, 132–137.
- 34 Y. Chang, L. Mao, L. Zhang, Y. Zhang and H. Jiang, Combined toxicity of imidacloprid, acetochlor, and tebuconazole to zebrafish (*Danio rerio*): acute toxicity and hepatotoxicity assessment, *Environ. Sci. Pollut. Res.*, 2020, **27**, 10286–10295.
- 35 L. H. M. L. M. Santos, M. Gros, S. Rodriguez-Mozaz, C. Delerue-Matos, A. Pena, D. Barceló and M. C. B. S. M. Montenegro, Contribution of hospital effluents to the load of pharmaceuticals in urban wastewaters: Identification of ecologically relevant pharmaceuticals, *Sci. Total Environ.*, 2013, **461–462**, 302–316.
- 36 M. Cleuvers, Mixture toxicity of the anti-inflammatory drugs diclofenac, ibuprofen, naproxen, and acetylsalicylic acid, *Ecotoxicol. Environ. Saf.*, 2004, **59**, 309–315.
- 37 B. Ferrari, R. Mons, B. Vollat, B. Fraysse, N. Paxéus, R. Lo Giudice, A. Pollio and J. Garric, Environmental risk assessment of six human pharmaceuticals: Are the current environmental risk assessment procedures sufficient for the protection of the aquatic environment?, *Environ. Toxicol. Chem.*, 2004, **23**, 1344–1354.
- 38 C. I. Kosma, D. A. Lambropoulou and T. A. Albanis, Investigation of PPCPs in wastewater treatment plants in Greece: Occurrence, removal and environmental risk assessment, *Sci. Total Environ.*, 2014, **466–467**, 421–438.
- 39 M. Grung, T. Källqvist, S. Sakshaug, S. Skurtveit and K. V. Thomas, Environmental assessment of Norwegian priority pharmaceuticals based on the EMEA guideline, *Ecotoxicol. Environ. Saf.*, 2008, **71**, 328–340.
- 40 M. C. Finnegan, L. R. Baxter, J. D. Maul, M. L. Hanson and P. F. Hoekstra, Comprehensive characterization of the acute and chronic toxicity of the neonicotinoid insecticide thiamethoxam to a suite of aquatic primary producers, invertebrates, and fish, *Environ. Toxicol. Chem.*, 2017, **36**, 2838–2848.
- 41 M. Kuzmanović, A. Ginebreda, M. Petrović and D. Barceló, Risk assessment based prioritization of 200 organic micropollutants in 4 Iberian rivers, *Sci. Total Environ.*, 2015, **503–504**, 289–299.

- 42 Z. Q. Shi, Y. S. Liu, Q. Xiong, W. W. Cai and G. G. Ying, Occurrence, toxicity and transformation of six typical benzotriazoles in the environment: A review, *Sci. Total Environ.*, 2019, **661**, 407–421.
- 43 A. Seeland, M. Oetken, A. Kiss, E. Fries and J. Oehlmann, Acute and chronic toxicity of benzotriazoles to aquatic organisms, *Environ. Sci. Pollut. Res.*, 2012, **19**, 1781–1790.
- 44 M. K. Durjava, B. Kolar, L. Arnus, E. Papa, S. Kovarich, U. Sahlin and W. Peijnenburg, Experimental assessment of the environmental fate and effects of triazoles and benzotriazole, *ATLA Altern. to Lab. Anim.*, 2013, **41**, 65–75.
- 45 M. Giraud, M. Douville, G. Cottin and M. Houde, Transcriptomic, cellular and life-history responses of *Daphnia magna* chronically exposed to benzotriazoles: Endocrinedisrupting potential and molting effects, *PLoS One*, 2017, **12**, 1–16.
- 46 D. E. Damalas, A. A. Bletsou, A. Agalou, D. Beis and N. S. Thomaidis, Assessment of the Acute Toxicity, Uptake and Biotransformation Potential of Benzotriazoles in Zebrafish (*Danio rerio*) Larvae Combining HILIC- with RPLC-HRMS for High-Throughput Identification, *Environ. Sci. Technol.*, 2018, **52**, 6023–6031.
- 47 D. A. Pillard, J. S. Cornell, D. L. DuFresne and M. T. Hernandez, Toxicity of benzotriazole and benzotriazole derivatives to three aquatic species, *Water Res.*, 2001, **35**, 557–560.
- 48 D. A. Cancilla, J. C. Baird, S. W. Geis and S. R. Corsi, Studies of the environmental fate and effect of aircraft deicing fluids: Detection of 5-methyl-1H-benzotriazole in the fathead minnow (*Pimephales promelas*), *Environ. Toxicol. Chem.*, 2003, **22**, 134–140.
- 49 S. R. Corsi, S. W. Geis, J. E. Loyo-Rosales and C. P. Rice, Aquatic toxicity of nine aircraft deicer and anti-icer formulations and relative toxicity of additive package ingredients alkylphenol ethoxylates and 4,5-methyl-1H-benzotriazoles, *Environ. Sci. Technol.*, 2006, **40**, 7409–7415.
- 50 D. A. Cancilla, J. C. Baird and R. Rosa, Detection of aircraft deicing additives in groundwater and soil samples from Fairchild Air Force Base, a small to moderate user of deicing fluids, *Bull. Environ. Contam. Toxicol.*, 2003, **70**, 868–875.
- 51 K. A. Sumon, A. K. Ritika, E. T. H. M. Peeters, H. Rashid, R. H. Bosma, M. S. Rahman, M. K. Fatema and P. J. Van den Brink, Effects of imidacloprid on the ecology of sub-tropical freshwater microcosms, *Environ. Pollut.*, 2018, **236**, 432–441.
- 52 M. Raby, X. Zhao, C. Hao, D. G. Poirier and P. K. Sibley, Chronic toxicity of 6 neonicotinoid insecticides to *Chironomus dilutus* and *Neocloeon triangulifer*, *Environ. Toxicol. Chem.*, 2018, **37**, 2727–2739.
- 53 US EPA, EFED Registration Chapter for Clothianidin for use on Potatoes and Grapes as a spray treatment and as a Seed Treatment for Sorghum and Cotton, [https://www3.epa.gov/pesticides/chem\\_search/cleared\\_reviews/csr\\_PC-044309\\_28-Sep-05\\_a.pdf](https://www3.epa.gov/pesticides/chem_search/cleared_reviews/csr_PC-044309_28-Sep-05_a.pdf), (accessed 3 February 2022).
- 54 K. R. Solomon, J. A. Carr, L. H. Du Preez, J. P. Giesy, R. J. Kendall, E. E. Smith and G. J. Van Der Kraak, Effects of atrazine on fish, amphibians, and aquatic reptiles: A critical review, *Crit. Rev. Toxicol.*, 2008, **38**, 721–772.
- 55 USGS, USGS current conditions for USGS 05454090 Muddy Creek at Coralville, Iowa., [https://waterdata.usgs.gov/ia/nwis/uv/?site\\_no=05454090&PARAMeter\\_cd=00065,00060](https://waterdata.usgs.gov/ia/nwis/uv/?site_no=05454090&PARAMeter_cd=00065,00060), (accessed 25 August 2020).
- 56 M. D. of Health, Human Health-Based Water Guidance Table, <https://www.health.state.mn.us/communities/environment/risk/guidance/gw/table.html>, (accessed 25 August 2020).
